# Supplementary material for: Genome-Wide Identification of Barley Long Noncoding RNAs and Analysis of Their Regulatory Interactions during Shoot and Grain Development
Source: MDPI journal article supplement (doi:10.3390/ijms22105087), 2021-05-11
Supplement: s1 [file s1]

A

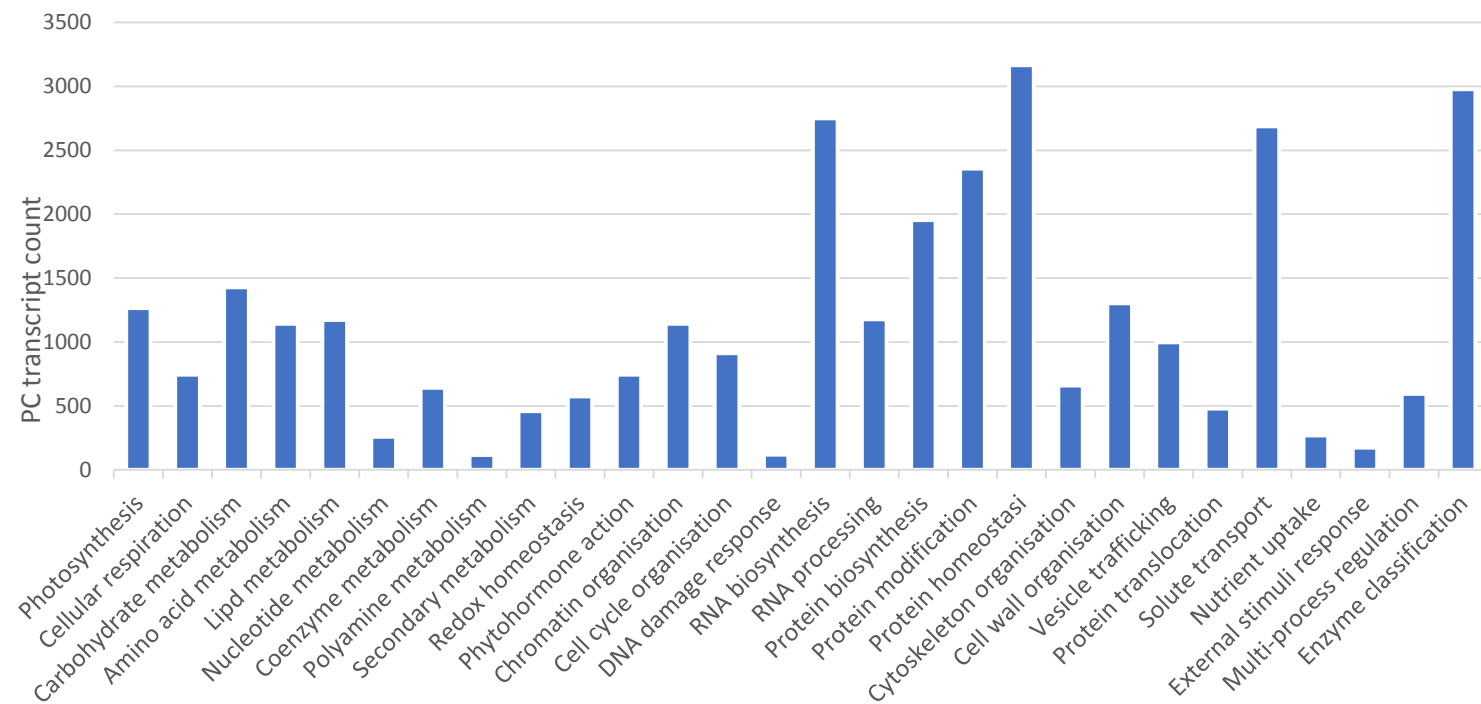

B

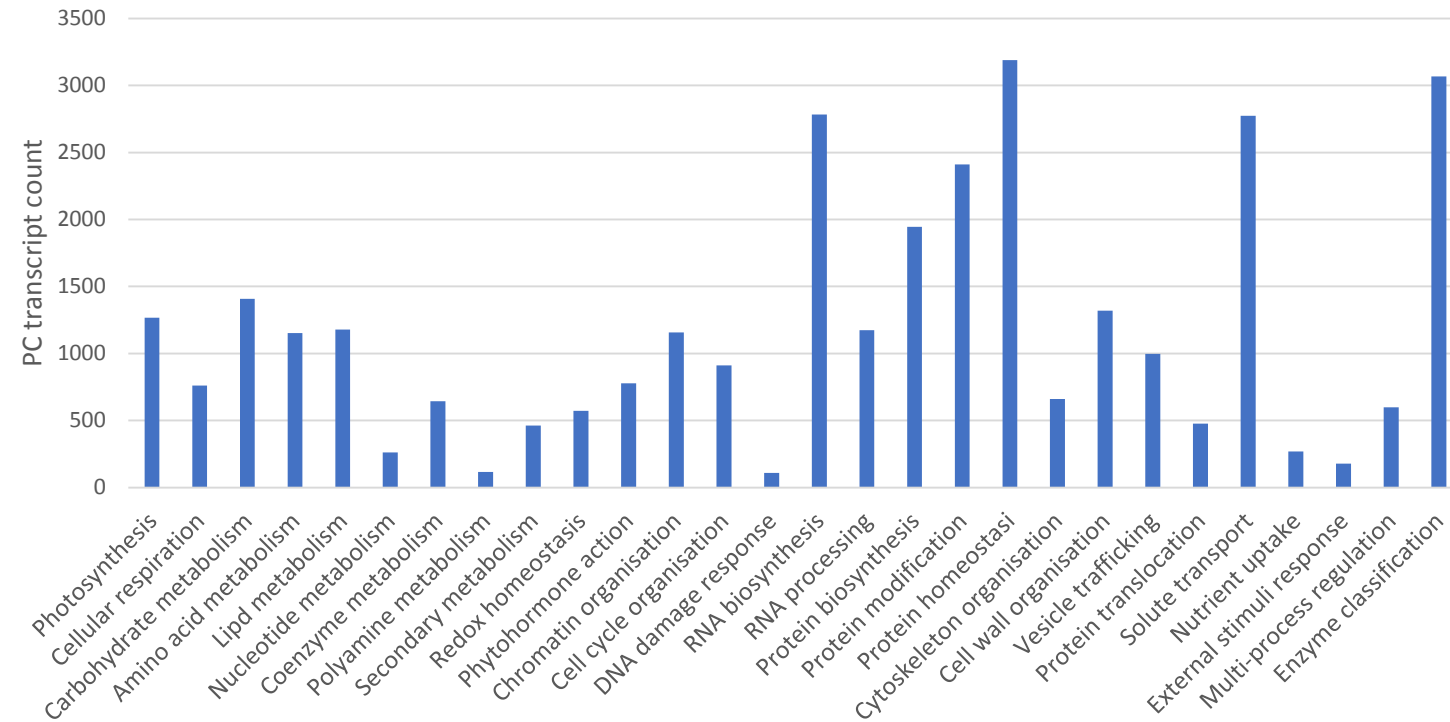

**Fig. S2** Functional annotation of upregulated (A) and downregulated (B) PC genes in the developing grains.
