# Supplementary material for: Genome-Wide Identification of Barley Long Noncoding RNAs and Analysis of Their Regulatory Interactions during Shoot and Grain Development
Source: MDPI journal article supplement (doi:10.3390/ijms22105087), 2021-05-11
Supplement: s1 [file s1]

**Table S1** Description of the RNAseq libraries used in this study

| Run         | Tissue           | Dev. stage / replicate     | RNA selection | Input reads | Uniquely mapped reads | Unique reads [%] |
|-------------|------------------|----------------------------|---------------|-------------|-----------------------|------------------|
| ERR781039   | shoot apex       | W 0.5_SD_rep1 <sup>a</sup> | oligo-dT      | 15324805    | 13012586              | 84.91            |
| ERR781040   | shoot apex       | W 0.5_SD_rep2              | oligo-dT      | 5269320     | 4493415               | 85.28            |
| ERR781041   | shoot apex       | W 0.5_SD_rep3              | oligo-dT      | 3816694     | 3114026               | 81.59            |
| ERR781045   | shoot apex       | W 1_LD_rep1 <sup>b</sup>   | oligo-dT      | 16201529    | 13746672              | 84.85            |
| ERR781046   | shoot apex       | W 1_LD_rep2                | oligo-dT      | 16233919    | 13396981              | 82.52            |
| ERR781047   | shoot apex       | W 1_LD_rep3                | oligo-dT      | 14865452    | 12570935              | 84.56            |
| ERR781056   | shoot apex       | W 2_SD_rep1                | oligo-dT      | 17361682    | 14981594              | 86.29            |
| ERR781057   | shoot apex       | W 2_SD_rep2                | oligo-dT      | 16887637    | 14570362              | 86.28            |
| ERR781058   | shoot apex       | W 2_SD_rep3                | oligo-dT      | 12466095    | 10717532              | 85.97            |
| ERR781059   | shoot apex       | W 1_SD_rep1                | oligo-dT      | 18945581    | 16220471              | 85.62            |
| ERR781060   | shoot apex       | W 1_SD_rep2                | oligo-dT      | 13076943    | 11197319              | 85.63            |
| ERR781061   | shoot apex       | W 1_SD_rep3                | oligo-dT      | 16407869    | 13875298              | 84.56            |
| ERR781071   | shoot apex       | W 3.5_LD_rep1              | oligo-dT      | 8012828     | 6676782               | 83.33            |
| ERR781072   | shoot apex       | W 3.5_LD_rep2              | oligo-dT      | 8282206     | 6948478               | 83.90            |
| ERR781073   | shoot apex       | W 3.5_LD_rep3              | oligo-dT      | 4756304     | 4035793               | 84.85            |
| ERR781083   | shoot apex       | W 3.5_SD_rep1              | oligo-dT      | 18186027    | 13953477              | 76.73            |
| ERR781084   | shoot apex       | W 3.5_SD_rep2              | oligo-dT      | 8326825     | 6900713               | 82.87            |
| ERR781085   | shoot apex       | W 3.5_SD_rep3              | oligo-dT      | 9119672     | 7494508               | 82.18            |
| SRR10436257 | root meristem    | 3 days_rep1                | random primer | 48823968    | 39742888              | 81.40            |
| SRR10436260 | root meristem    | 3 days_rep2                | random primer | 41437658    | 33374430              | 80.54            |
| SRR10436263 | root meristem    | 3 days_rep3                | random primer | 42945302    | 34687208              | 80.77            |
| SRR10436266 | root meristem    | 3 days_rep4                | random primer | 38800255    | 32212554              | 83.02            |
| SRR10436255 | root elong. zone | 3 days_rep1                | random primer | 38895728    | 33613234              | 86.42            |
| SRR10436259 | root elong. zone | 3 days_rep2                | random primer | 45637837    | 36645038              | 80.30            |
| SRR10436262 | root elong. zone | 3 days_rep3                | random primer | 44297493    | 35518588              | 80.18            |
| SRR10436265 | root elong. zone | 3 days_rep4                | random primer | 39482115    | 32928084              | 83.40            |
| SRR10436261 | root cap         | 3 days_rep1                | random primer | 43218267    | 35894054              | 83.05            |
| SRR10436245 | root cap         | 3 days_rep2                | random primer | 38087041    | 34247656              | 89.92            |
| SRR10436264 | root cap         | 3 days_rep3                | random primer | 41747316    | 33862556              | 81.11            |
| SRR10436258 | root cap         | 3 days_rep4                | random primer | 37518812    | 20841242              | 55.55            |
| SRR10672924 | scutellum        | 96h_rep1                   | oligo-dT      | 9108531     | 6343476               | 69.64            |
| SRR10672925 | scutellum        | 96h_rep2                   | oligo-dT      | 11023117    | 7536040               | 68.37            |
| SRR10672926 | scutellum        | 96h_rep3                   | oligo-dT      | 10388509    | 7405793               | 71.29            |
| SRR10672941 | embryo           | 96h_rep1                   | oligo-dT      | 10135243    | 6956122               | 68.63            |
| SRR10672942 | embryo           | 96h_rep2                   | oligo-dT      | 10593645    | 6657237               | 62.84            |
| SRR10672943 | embryo           | 96h_rep3                   | oligo-dT      | 11915785    | 8365528               | 70.21            |
| SRR10672957 | aleurone         | 96h_rep1                   | oligo-dT      | 12023832    | 8772699               | 72.96            |
| SRR10672958 | aleurone         | 96h_rep2                   | oligo-dT      | 11642221    | 8205159               | 70.48            |

**Table S1** continued

| Run          | Tissue      | Dev. stage /<br>replicate | RNA<br>selection | Input reads       | Uniquely<br>mapped reads | Unique reads<br>[%] |
|--------------|-------------|---------------------------|------------------|-------------------|--------------------------|---------------------|
| SRR10672959  | aleurone    | 96h_rep3                  | oligo-dT         | 8648885           | 6459005                  | 74.68               |
| SRR4380201   | stem base   | 1DAG_rep1 <sup>c</sup>    | oligo-dT         | 76177362          | 60309534                 | 79.17               |
| SRR4380202   | stem base   | 1DAG_rep2                 | oligo-dT         | 63227909          | 50203113                 | 79.40               |
| SRR4380203   | stem base   | 1DAG_rep3                 | oligo-dT         | 60991125          | 48577407                 | 79.65               |
| SRR4380204   | stem base   | 10DAG_rep1                | oligo-dT         | 77896964          | 64391970                 | 82.66               |
| SRR4380205   | stem base   | 10DAG_rep2                | oligo-dT         | 54220130          | 44504422                 | 82.08               |
| SRR4380206   | stem base   | 10DAG_rep3                | oligo-dT         | 61531385          | 49888709                 | 81.08               |
| SRR5054865   | whole grain | 3DPA_rep1 <sup>d</sup>    | oligo-dT         | 32596699          | 27026153                 | 82.91               |
| SRR5054851   | whole grain | 3DPA_rep2                 | oligo-dT         | 32459730          | 26604811                 | 81.96               |
| SRR5054864   | whole grain | 8DPA_rep1                 | oligo-dT         | 32613463          | 27164779                 | 83.29               |
| SRR5054856   | whole grain | 8DPA_rep2                 | oligo-dT         | 32609773          | 27086570                 | 83.06               |
| SRR5054854   | whole grain | 13DPA_rep2                | oligo-dT         | 32599620          | 24361858                 | 74.73               |
| SRR5054857   | whole grain | 13DPA_rep1                | oligo-dT         | 32543237          | 24053873                 | 73.91               |
| SRR5054855   | whole grain | 18DPA_rep1                | oligo-dT         | 32564906          | 21544228                 | 66.16               |
| SRR5054863   | whole grain | 18DPA_rep2                | oligo-dT         | 32555771          | 21992007                 | 67.55               |
| <b>total</b> |             |                           |                  | <b>1474501022</b> | <b>1175884967</b>        | <b>79.74</b>        |

<sup>a</sup>SD short day conditions

<sup>b</sup>LD long day conditions

<sup>c</sup>DAG days after germination

<sup>d</sup>DPA days post anthesis
